# Supplementary material
Source: publisher figshare collection journal article supplement (https://tandf.figshare.com/ndownloader/files/2609391)
Supplement: Supplementary file 1 [file 2609391]

## Supplementary methods

### *Cross-validated Kaplan-Meier analyses*

The analyses were done as follows for each variable:

1. Patients were divided randomly into five similarly sized groups: P1, P2, P3, P4 and P5.
2. One of the groups was assigned test group and the remaining groups were assigned training group.
3. A threshold value was determined for the variable that divided the patients in the training group in two parts resulting in the lowest possible two-sided Mann-Whitney p-value.
4. The patients in the test group were designated as either having a low or a high value of the variable according to if the value of the variable was above or below the determined threshold.
5. Paragraphs 2–4 were repeated, changing the group designated test group each round, until all groups had been test groups once and all patients were designated either as having a low or a high value of the variable.
6. The cross-validated Kaplan-Meier plot was plotted and a Mann-Whitney U test statistic was calculated.
7. A p-value was calculated by comparing the Mann-Whitney U test statistic with the permutation distribution of Mann-Whitney U test statistics. The permutation distribution was obtained by permutating the survival time and subsequently repeating paragraph 1–6 500 times.

### *Random Forest classification with variable subset selection*

1. Annotation data was randomly divided into training and test data sets. 80% of the data constituted training data and 20% test data.
2. For each variable, a two-sided Mann-Whitney U test was performed on the training data comparing the variable values for the two classes, resulting in one p-value per variable.
3. For each value of  $k = 1, 2, \dots, 5$ ,  $k$  variables with lowest p-values were selected. Using an inner 5-fold cross validation the performance of each Random Forest model was assessed based on these  $k$  variables. As a performance measure error rate was used, i.e. the fraction of incorrect classifications.

4. The  $k$  that gave the best performance was selected and a model using Random Forest was built based on the  $k$  best variables.
5. The model was used to predict the class for each of the patients in the test data set and error rate was computed.

1–5 was repeated 100 times, resulting in 100 error rates, which were summarized in an average error rate.

Permutations were adopted to estimate the significance of such an average error rate, i.e. the survival times were randomly permuted so that the measurements were randomly connected to a survival time. The permutation was repeated 500 times and for each permutation the variable subset selection, Random Forest model and evaluation procedure was performed.

## References

- [1] Muramatsu T, Miyauchi T. Basigin (CD147): A multifunctional transmembrane protein involved in reproduction, neural function, inflammation and tumor invasion. *Histol Histopathol* 2003;18:981–7.
- [2] Ju XZ, Yang JM, Zhou XY, Li ZT, Wu XH. EMMPRIN expression as a prognostic factor in radiotherapy of cervical cancer. *Clin Cancer Res* 2008;14:494–501.
- [3] Tsai WC, Chen Y, Huang LC, Lee HS, Ma HI, Huang SM, et al. EMMPRIN expression positively correlates with WHO grades of astrocytomas and meningiomas. *J Neurooncol* 2013;114:281–90.
- [4] Tian L, Zhang Y, Chen Y, Cai M, Dong H, Xiong L. EMMPRIN is an independent negative prognostic factor for patients with astrocytic glioma. *PloS One* 2013;8:e58069.
- [5] Sameshima T, Nabeshima K, Toole BP, Inoue T, Yokogami K, Nakano S, et al. Correlation of emmprin expression in vascular endothelial cells with blood-brain-barrier function: a study using magnetic resonance imaging enhanced by Gd-DTPA and immunohistochemistry in brain tumors. *Virchows Archiv* 2003;442:577–84.
- [6] McDonald PC, Winum JY, Supuran CT, Dedhar S. Recent developments in targeting carbonic anhydrase IX for cancer therapeutics. *Oncotarget* 2012;3:84–97.
- [7] Schrijvers ML, van der Laan BF, de Bock GH, Pattje WJ, Mastik MF, Menkema L, et al. Overexpression of intrinsic hypoxia markers HIF1alpha and CA-IX predict for local recurrence in stage T1-T2 glottic laryngeal carcinoma treated with radiotherapy. *Int J Radiat Oncol Biol Phys* 2008;72:161–9.
- [8] Giatromanolaki A, Koukourakis MI, Sivridis E, Pastorek J, Wykoff CC, Gatter KC, et al. Expression of hypoxia-inducible carbonic anhydrase-9 relates to angiogenic pathways and independently to poor outcome in non-small cell lung cancer. *Cancer Res* 2001;61:7992–8.
- [9] Brennan DJ, Jirstrom K, Kronblad A, Millikan RC, Landberg G, Duffy MJ, et al. CA IX is an independent prognostic marker in premenopausal breast cancer patients with one to three positive lymph nodes and a putative marker of radiation resistance. *Clin Cancer Res* 2006;12:6421–31.

- [10] Liao SY, Darcy KM, Randall LM, Tian C, Monk BJ, Burger RA, et al. Prognostic relevance of carbonic anhydrase-IX in high-risk, early-stage cervical cancer: A Gynecologic Oncology Group study. *Gynecol Oncol* 2010;116:452–8.
- [11] Koukourakis MI, Bentzen SM, Giatromanolaki A, Wilson GD, Daley FM, Saunders MI, et al. Endogenous markers of two separate hypoxia response pathways (hypoxia inducible factor 2 alpha and carbonic anhydrase 9) are associated with radiotherapy failure in head and neck cancer patients recruited in the CHART randomized trial. *J Clin Oncol* 2006;24:727–35.
- [12] Erpolat OP, Gocun PU, Akmansu M, Ozgun G, Akyol G. Hypoxia-related molecules HIF-1alpha, CA9, and osteopontin: Predictors of survival in patients with high-grade glioma. *Strahlenther Onkol* 2013;189:147–54.
- [13] Jarvela S, Parkkila S, Bragge H, Kahkonen M, Parkkila AK, Soini Y, et al. Carbonic anhydrase IX in oligodendroglial brain tumors. *BMC Cancer* 2008;8:1.
- [14] Haapasalo JA, Nordfors KM, Hilvo M, Rantala JJ, Soini Y, Parkkila AK, et al. Expression of carbonic anhydrase IX in astrocytic tumors predicts poor prognosis. *Clin Cancer Res* 2006;12:473–7.
- [15] Naor D, Sionov RV, Ish-Shalom D CD44: Structure, function, and association with the malignant process. *Advance Cancer Res* 1997;71:241–319.
- [16] de Jong MC, Pramana J, van der Wal JE, Lacko M, Peutz-Kootstra CJ, de Jong JM, et al. CD44 expression predicts local recurrence after radiotherapy in larynx cancer. *Clin Cancer Res* 2010;16:5329–38.
- [17] Yoshida T, Matsuda Y, Naito Z, Ishiwata T. CD44 in human glioma correlates with histopathological grade and cell migration. *Pathol Int* 2012;62:463–70.
- [18] Martineau Y, Azar R, Bousquet C, Pyronnet S. Anti-oncogenic potential of the eIF4E-binding proteins. *Oncogene* 2013;32:671–7.
- [19] Benavente S, Verges R, Hermosilla E, Fumanal V, Casanova N, Garcia A, et al. Overexpression of phosphorylated 4E-BP1 predicts for tumor recurrence and reduced survival in cervical carcinoma treated with postoperative radiotherapy. *Int J Radiat Oncol Biol Phys* 2009;75:1316–22.
- [20] Brooks AN, Kilgour E, Smith PD. Molecular pathways: Fibroblast growth factor signaling: A new therapeutic opportunity in cancer. *Clin Cancer Res* 2012;18:1855–62.
- [21] Rades D, Setter C, Dahl O, Schild SE, Noack F. Fibroblast growth factor 2 – a predictor of outcome for patients irradiated for stage II-III non-small-cell lung cancer. *Int J Radiat Oncol Biol Phys* 2012;82:442–7.
- [22] Rades D, Seibold ND, Gebhard MP, Noack F, Schild SE. Fibroblast growth factor 2 is of prognostic value for patients with locally advanced squamous cell carcinoma of the head and neck. *Strahlenther Onkol* 2014;190:68–74.
- [23] Yiangou C, Gomm JJ, Coope RC, Law M, Luqmani YA, Shousha S, et al. Fibroblast growth factor 2 in breast cancer: Occurrence and prognostic significance. *Br J Cancer* 1997;75:28–33.
- [24] Takahashi JA, Fukumoto M, Igarashi K, Oda Y, Kikuchi H, Hatanaka M. Correlation of basic fibroblast growth factor expression levels with the degree of malignancy and vascularity in human gliomas. *J Neurosurgery* 1992;76:792–8.
- [25] Costa A, Ilves I, Tamberg N, Petojevic T, Nogales E, Botchan MR, et al. The structural basis for MCM2-7 helicase activation by GINS and Cdc45. *Nat Struct Mol Biol* 2011;18:471–7.
- [26] Szelachowska J, Dziegiel P, Jelen-Krzeszewska J, Jelen M, Matkowski R, Pomiecko A, et al. Mcm-2 protein expression predicts prognosis better than Ki-67 antigen in oral cavity squamocellular carcinoma. *Anticancer Res* 2006;26:2473–8.
- [27] Wharton SB, Chan KK, Anderson JR, Stoeber K, Williams GH. Replicative Mcm2 protein as a novel proliferation marker in oligodendrogliomas and its relationship to Ki67 labelling index, histological grade and prognosis. *Neuropathol App Neurobiol* 2001;27:305–13.
- [28] Babu SN, Chetal G, Kumar S. Macrophage migration inhibitory factor: A potential marker for cancer diagnosis and therapy. *Asian Pacific J Cancer Prevent* 2012;13:1737–44.
- [29] Suzuki F, Nakamaru Y, Oridate N, Homma A, Nagahashi T, Yamaguchi S, et al. Prognostic significance of cytoplasmic macrophage migration inhibitory factor expression in patients with squamous cell carcinoma of the head and neck treated with concurrent chemoradiotherapy. *Oncol Rep* 2005;13:59–64.
- [30] Wang XB, Tian XY, Li Y, Li B, Li Z. Elevated expression of macrophage migration inhibitory factor correlates with tumor recurrence and poor prognosis of patients with gliomas. *J Neurooncol* 2012;106:43–51.
- [31] Dang CV. MYC on the path to cancer. *Cell* 2012;149:22–35.
- [32] Vijayalakshmi N, Selvaluxmi G, Mahji U, Rajkumar T. C-myc oncoprotein expression and prognosis in patients with carcinoma of the cervix: an immunohistochemical study. *Eur J Gynaecol Oncol* 2002;23:135–8.
- [33] Hayashi S, Yamamoto M, Ueno Y, Ikeda K, Ohshima K, Soma G, et al. Expression of nuclear factor-kappa B, tumor necrosis factor receptor type 1, and c-Myc in human astrocytomas. *Neurol Med Chir* 2001;41:187–95.
- [34] Cenci T, Martini M, Montano N, D'Alessandris QG, Falchetti ML, Annibali D, et al. Prognostic relevance of c-Myc and BMI1 expression in patients with glioblastoma. *Am J Clin Pathol* 2012;138:390–6.
- [35] Dhar SK, St Clair DK. Manganese superoxide dismutase regulation and cancer. *Free Rad Biol Med* 2012;52:2209–22.
- [36] Fu TY, Hou YY, Chu ST, Liu CF, Huang CH, Chen HC, et al. Manganese superoxide dismutase and glutathione peroxidase as prognostic markers in patients with buccal mucosal squamous cell carcinomas. *Head Neck* 2011;33:1606–15.
- [37] Nakano T, Oka K, Taniguchi N. Manganese superoxide dismutase expression correlates with p53 status and local recurrence of cervical carcinoma treated with radiation therapy. *Cancer Res* 1996;56:2771–5.
- [38] Pu PY, Lan J, Shan SB, Huang EQ, Bai Y, Guo Y, et al. Study of the antioxidant enzymes in human brain tumors. *J Neurooncol* 1996;29:121–8.
- [39] Hussain SP, Harris CC. p53 biological network: At the crossroads of the cellular-stress response pathway and molecular carcinogenesis. *J Nippon Med School* 2006;73:54–64.
- [40] Langendijk JA, Thunnissen FB, Lamers RJ, de Jong JM, ten Velde GP, Wouters EF. The prognostic significance of accumulation of p53 protein in stage III non-small cell lung cancer treated by radiotherapy. *Radiother Oncol* 1995;36:218–24.
- [41] Chen MB, Wu XY, Yu R, Li C, Wang LQ, Shen W, et al. P53 status as a predictive biomarker for patients receiving neoadjuvant radiation-based treatment: A meta-analysis in rectal cancer. *PloS One* 2012;7:e45388.
- [42] Kim K, Chie EK, Han W, Noh DY, Park IA, Oh DY, et al. Prognostic value of p53 and bcl-2 expression in patients treated with breast conservative therapy. *J Korean Med Sci* 2010;25:235–9.
- [43] Skirnisdottir I, Sorbe B, Karlsson M, Seidal T. Prognostic importance of DNA ploidy and p53 in early stages of epithelial ovarian carcinoma. *Int J Oncol* 2001;19:1295–302.

- [44] Pomp J, Blom J, Zwinderman AH, Van Krimpen C. P53 and radiotherapy for oesophageal carcinoma: A comparison between 4 different antibodies. *Oncol Rep* 2000;7:1075–8.
- [45] Nagy B, Tiszlavicz L, Eller J, Molnar J, Thurzo L. Ki-67, cyclin D1, p53 and bcl-2 expression in advanced head and neck cancer. *In vivo* 2003;17:93–6.
- [46] Scherr DS, Vaughan ED, Jr., Wei J, Chung M, Felsen D, Albright R, et al. BCL-2 and p53 expression in clinically localized prostate cancer predicts response to external beam radiotherapy. *J Urol* 1999;162:12–6; discussion 16–7.
- [47] Kros JM, Godschalk JJ, Krishnadath KK, Van Eden CG. Expression of p53 in oligodendrogliomas. *J Pathol* 1993;171:285–90.
- [48] Kyritsis AP, Bondy ML, Hess KR, Cunningham JE, Zhu D, Amos CJ, et al. Prognostic significance of p53 immunoreactivity in patients with glioma. *Clin Cancer Res* 1995;1:1617–22.
- [49] Malkoun N, Chargari C, Forest F, Fotso MJ, Cartier L, Auberdiac P, et al. Prolonged temozolomide for treatment of glioblastoma: Preliminary clinical results and prognostic value of p53 overexpression. *J Neurooncol* 2012;106:127–33.
- [50] Soini Y, Niemela A, Kamel D, Herva R, Bloigu R, Paakko P, et al. p53 immunohistochemical positivity as a prognostic marker in intracranial tumours. *Acta Patholog Microbiol Immunol Scand* 1994;102:786–92.
- [51] Collavin L, Lunardi A, Del Sal G. p53-family proteins and their regulators: Hubs and spokes in tumor suppression. *Cell Death Different* 2010;17:901–11.
- [52] Liu SS, Chan KY, Cheung AN, Liao XY, Leung TW, Ngan HY. Expression of deltaNp73 and TAp73alpha independently associated with radiosensitivities and prognoses in cervical squamous cell carcinoma. *Clin Cancer Res* 2006;12:3922–7.
- [53] Huang MY, Wang JY, Chang HJ, Kuo CW, Tok TS, Lin SR. CDC25A, VAV1, TP73, BRCA1 and ZAP70 gene overexpression correlates with radiation response in colorectal cancer. *Oncol Rep* 2011;25:1297–306.

Supplementary Table I. P-values for the univariate and multivariate Cox regression analyses. NA=P-value is missing because there were too few samples to do Cox regression analysis.
